# Supplementary material for: mRNA-Seq and MicroRNA-Seq Whole-Transcriptome Analyses of Rhesus Monkey Embryonic Stem Cell Neural Differentiation Revealed the Potential Regulators of Rosette Neural Stem Cells
Source: PubMed Central journal article supplement (PMC4195499; doi:10.1093/dnares/dsu019), 2014-06-17
Supplement: supp_dsu019_dsu019supp_fig1.pdf [file supp_dsu019_dsu019supp_fig1.pdf]

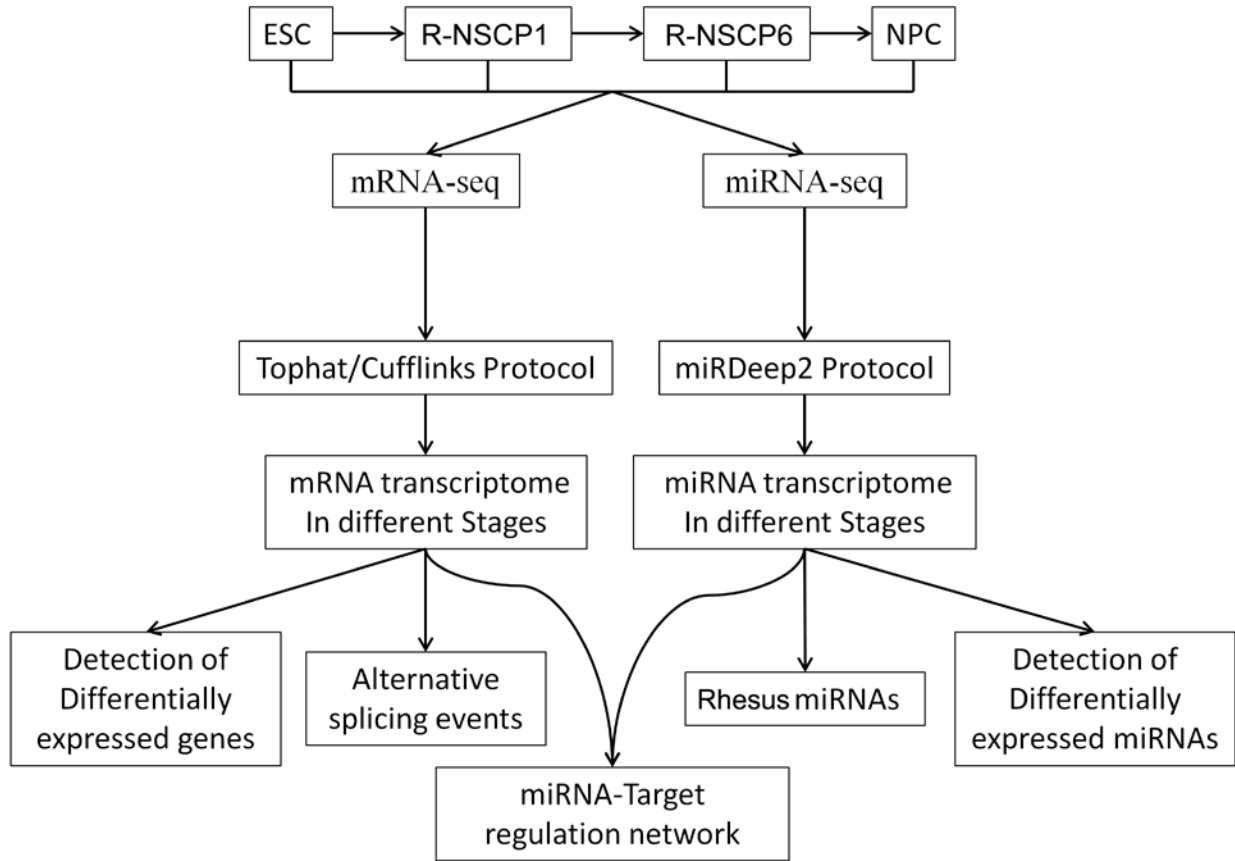

**Supplementary Figure S1. Study design.** We performed parallel genome-wide analysis of mRNA and miRNA expression profiling in four stages from rhesus monkey ESC neural differentiation, including ESCs, R-NSCP1, R-NSCP6, and NPC.
