# Supplementary material for: mRNA-Seq and MicroRNA-Seq Whole-Transcriptome Analyses of Rhesus Monkey Embryonic Stem Cell Neural Differentiation Revealed the Potential Regulators of Rosette Neural Stem Cells
Source: PubMed Central journal article supplement (PMC4195499; doi:10.1093/dnares/dsu019), 2014-06-17
Supplement: supp_dsu019_dsu019supp_fig2.pdf [file supp_dsu019_dsu019supp_fig2.pdf]

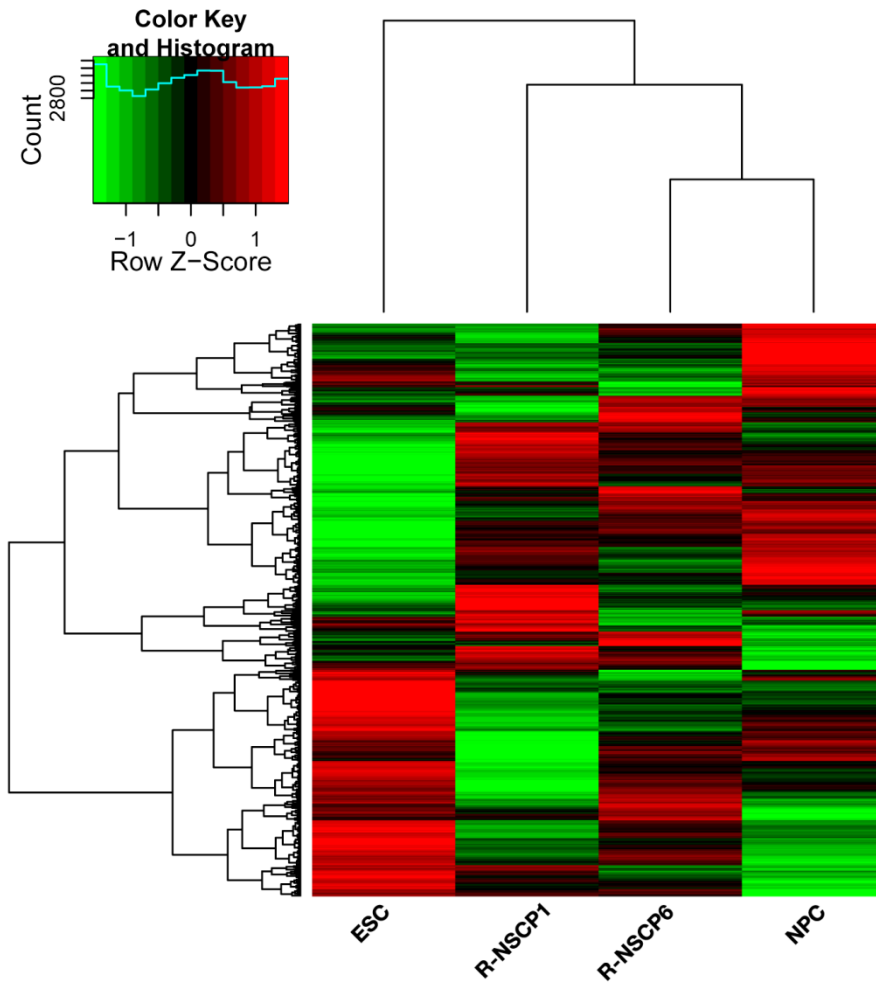

**Supplementary Figure S2. Hierarchical clustering of mRNA expression profiling in four stages.** In the plot, rows represent genes while columns are stages.
