# Supplementary material for: mRNA-Seq and MicroRNA-Seq Whole-Transcriptome Analyses of Rhesus Monkey Embryonic Stem Cell Neural Differentiation Revealed the Potential Regulators of Rosette Neural Stem Cells
Source: PubMed Central journal article supplement (PMC4195499; doi:10.1093/dnares/dsu019), 2014-06-17
Supplement: supp_dsu019_dsu019supp_fig3.pdf [file supp_dsu019_dsu019supp_fig3.pdf]

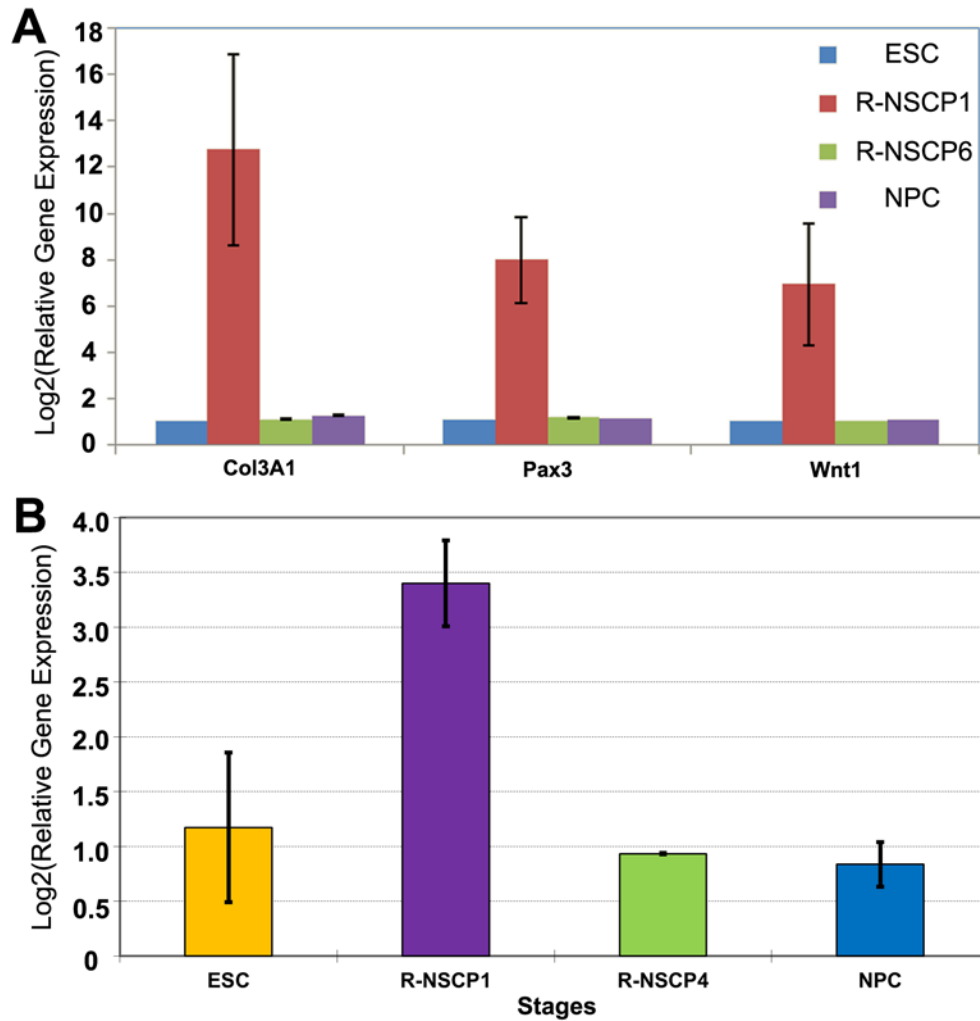

**Supplementary Figure S3. Validation of signature genes using qRT-PCR.** Panel (A) indicates Expression profiles for PAX3, Col3A1, and WNT1 in ESCs, R-NSCP1, R-NSCP6, and NPC. Panel (B) is the qRT-PCR results for gene AXIN2 during in ESCs, R-NSCP1, R-NSCP4, and NPC. R-NSCP4 is defined as the fourth passage of rosettes culture, which is similar to R-NSCP6.
