# Supplementary material for: mRNA-Seq and MicroRNA-Seq Whole-Transcriptome Analyses of Rhesus Monkey Embryonic Stem Cell Neural Differentiation Revealed the Potential Regulators of Rosette Neural Stem Cells
Source: PubMed Central journal article supplement (PMC4195499; doi:10.1093/dnares/dsu019), 2014-06-17
Supplement: supp_dsu019_dsu019supp_fig4.pdf [file supp_dsu019_dsu019supp_fig4.pdf]

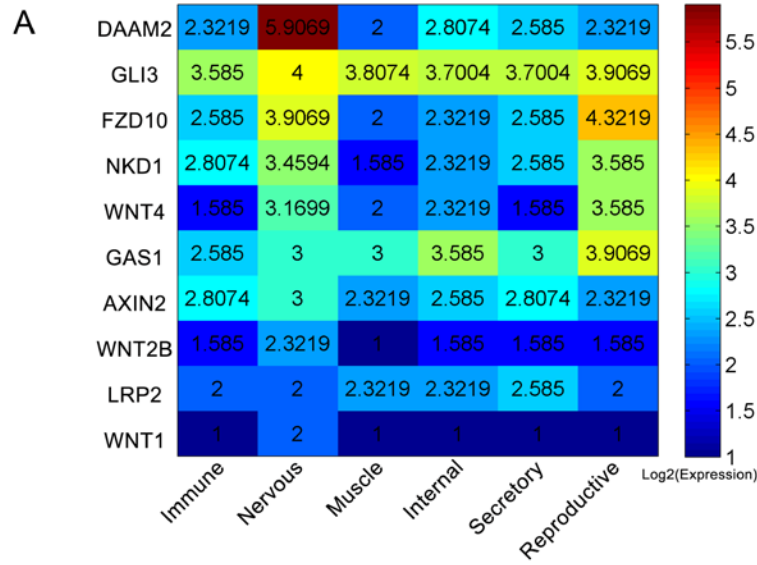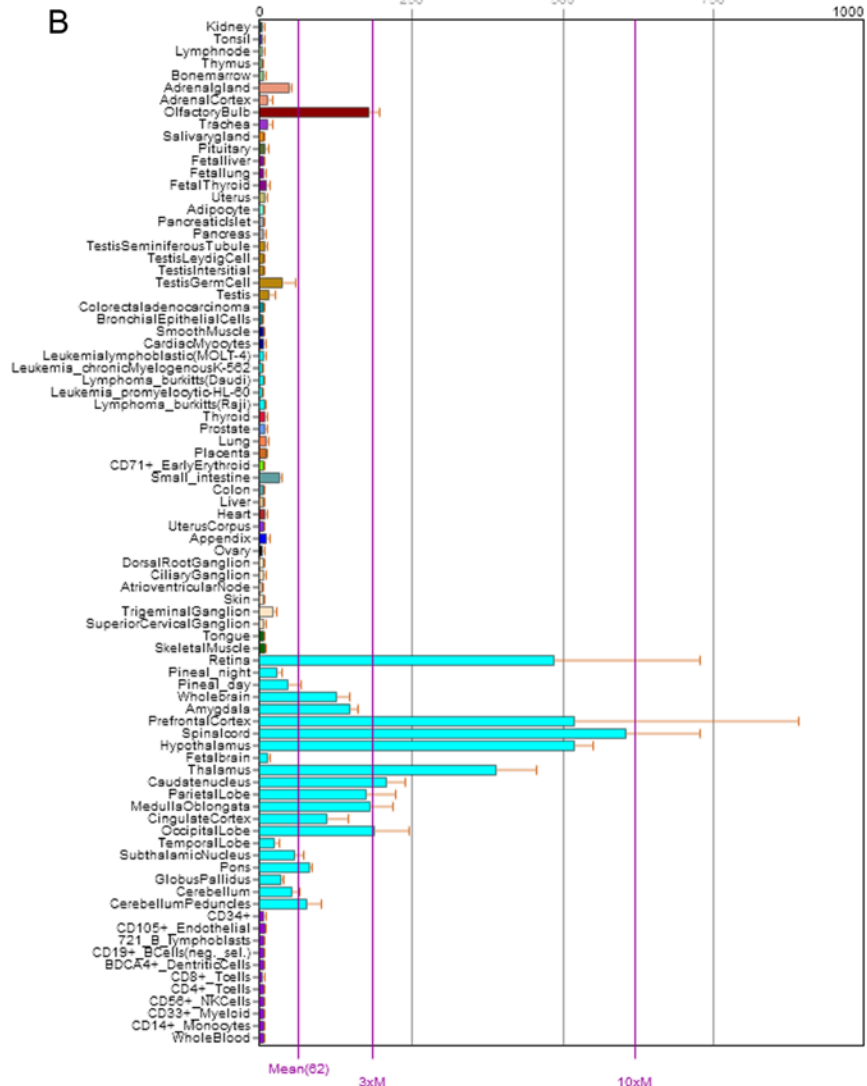

**Supplementary Figure S4. Expression patterns of gene signatures in Hedgehog and Wnt signaling pathways in human tissues. (A)** Heatmap plot of expression

levels of gene signatures involved in Hedgehog and Wnt signaling pathways in six human systems, including Immune, Nervous, Muscle, Internal, Secretory, and

Reproductive organs. **(B)** Gene DAAM2 (dishevelled associated activator of morphogenesis 2) belongs Wnt signaling pathway and is an R-NSC prevalent gene

signature. The figure shows that the gene is predominantly expressed in human neural tissues.
